# Supplementary material for: PGC-1 alpha overexpression in the skeletal muscle results in a metabolically active microbiome which is independent of redox signaling
Source: Research Square preprint supplement (doi:10.21203/rs.3.rs-5982826/v1), 2025-04-28
Supplement: Supplementary file [file 018616c00af5db263371e311.pdf]

## Supplementary information

### **Table S1 Taxon comparison of treatment groups at the genus level**

Columns depict taxon name, log 2 fold changes, the unmodified p value of group comparison, and Benjamini-Hochberg corrected p values

### **Table S2 Biological pathway comparison of treatment groups at the genus level**

Columns depict biological pathway name, log 2 fold changes, the unmodified p value of group comparison, and Benjamini-Hochberg corrected p values

### **Figure S1 Effects of muscle specific PGC-1 $\alpha$ over expression and exercise on gut microbiological**

**biological pathways.** a-d panels show the changes in the abundance of bacterial pathways in the gut microbiome at the genus level. Red dots represent significantly increased abundance, while blue dots indicate significantly decreased abundance between the groups depicted in the upper right corner of each panel. The green dashed line marks the Benjamini-Hochberg (BH) correction threshold, and gray lines indicate  $\pm 0.5$  Log2 fold change.

Original western blot images. Red underlines indicate the bands selected and shown in Figure 3 a-j and Figure 1 b.

a

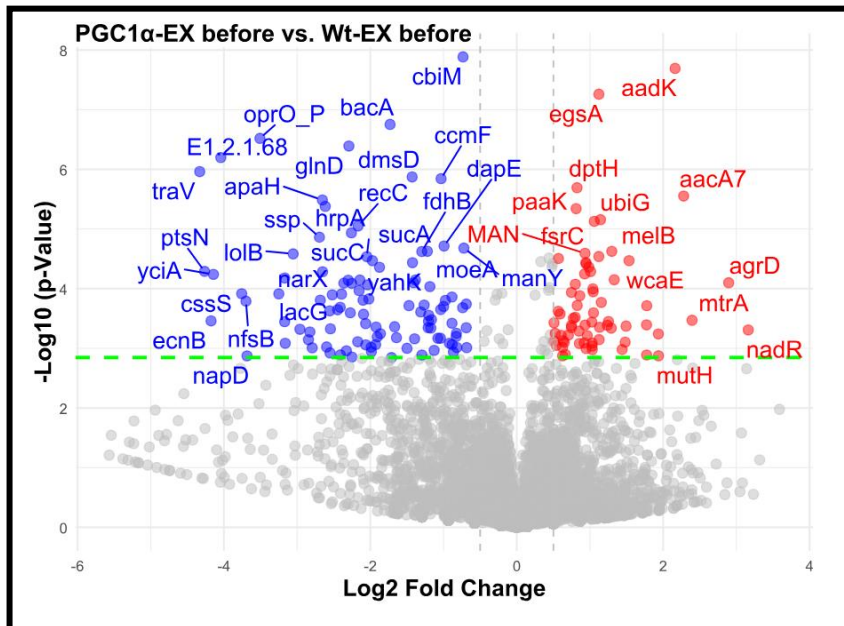

b

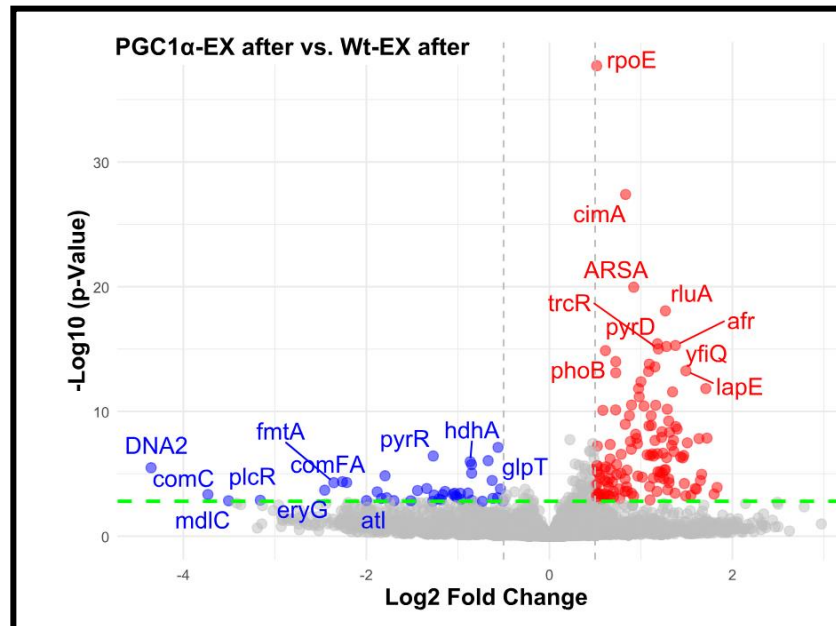

c

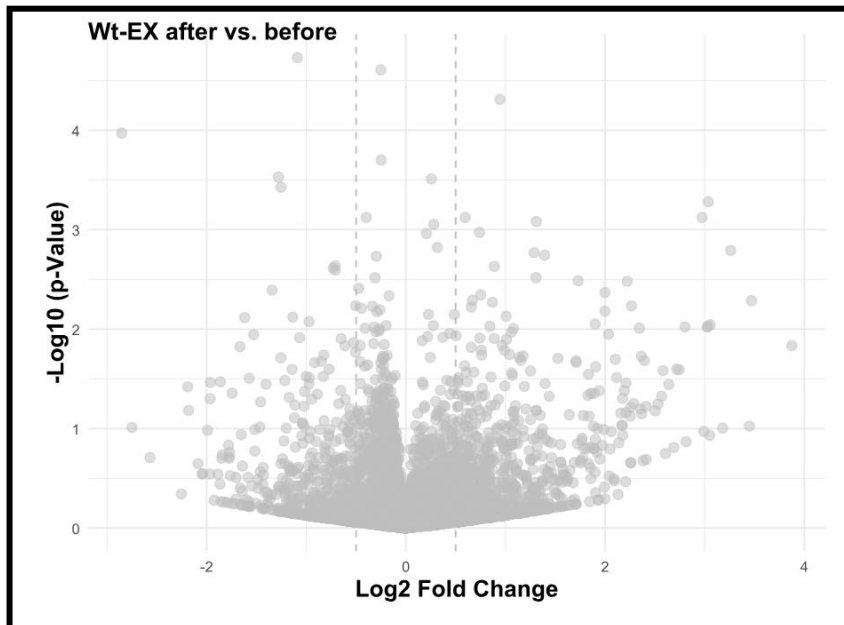

d

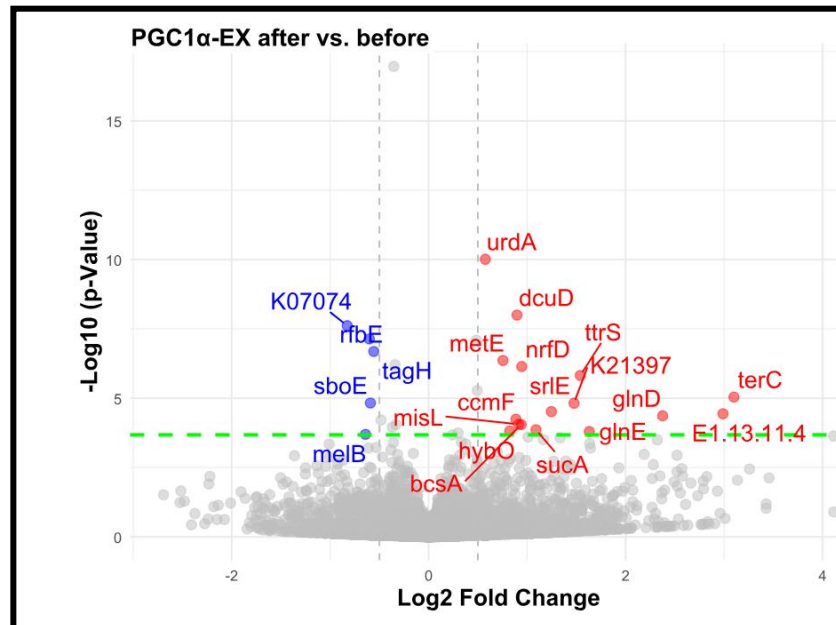

- Relative Ab. increased
- Relative Ab. decreased
- Not significant
- BH threshold



PGC-1α

A Western blot image showing multiple lanes. A specific band is highlighted with a red horizontal line. The label 'PGC-1α' is positioned to the left of the band.

PGC-1α (figure 3 h)



GAPDH

A Western blot image showing multiple lanes. A specific band is highlighted with a red horizontal line. The label 'GAPDH' is positioned to the left of the band.

Mfn1

GAPDH

MFN1 (figure 3 j)

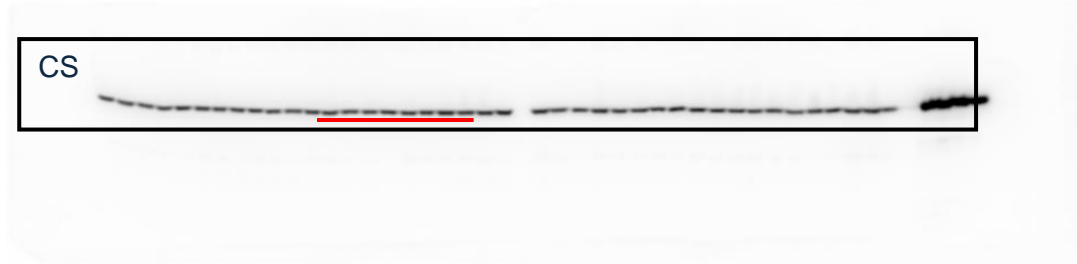

CS (figure 3 i)

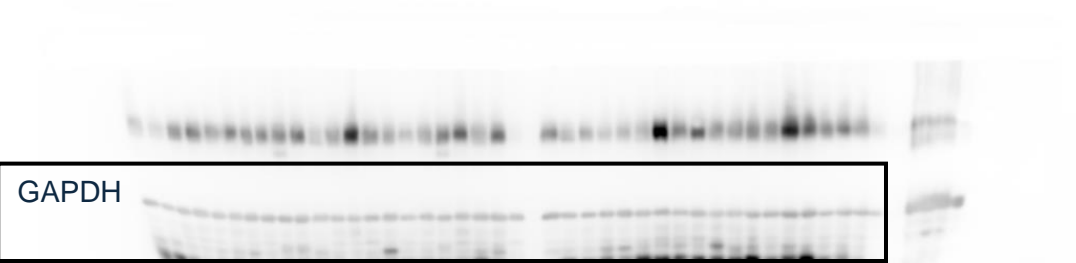

pAMPK

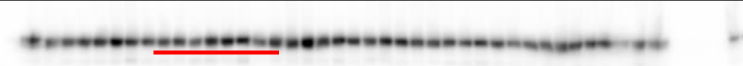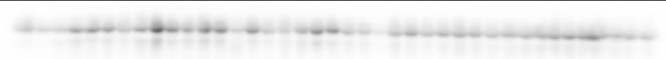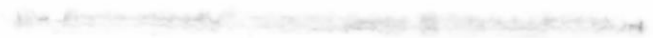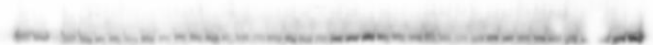

p/t AMPK (figure 3 a)

total AMPK

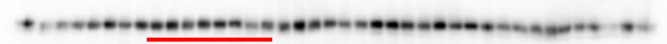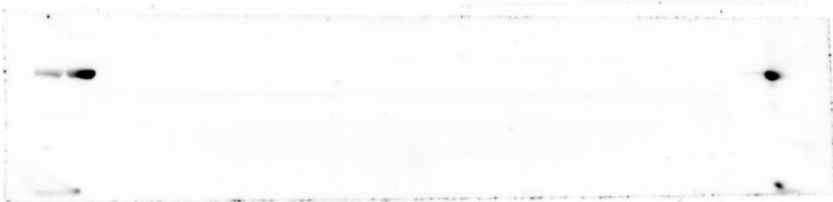

p mTOR

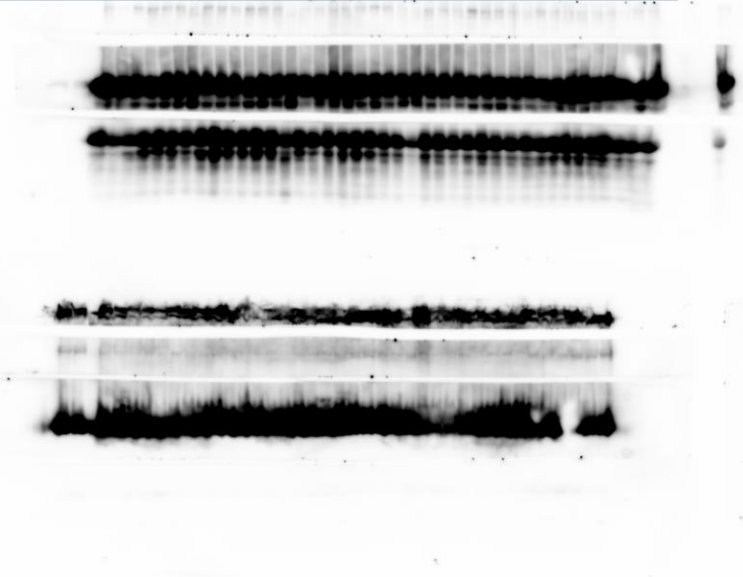

p/t mTOR (figure 3 c)

t mTOR

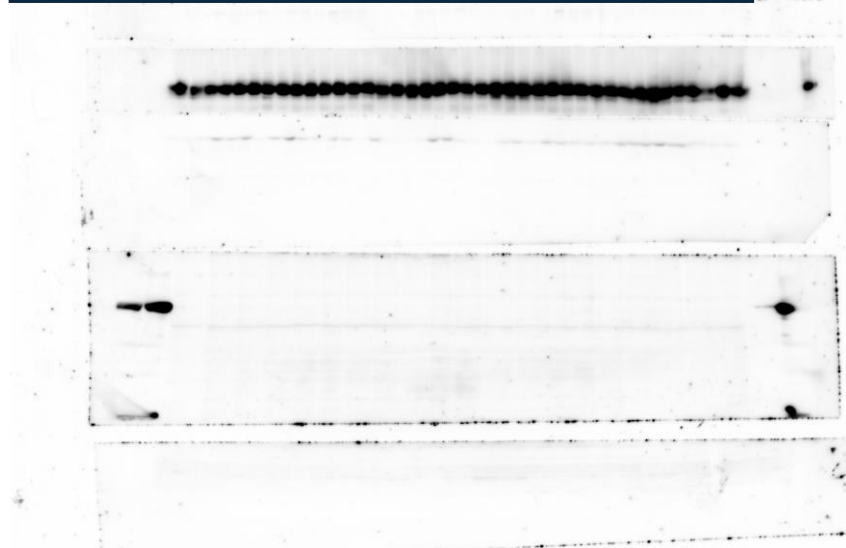

p CREB

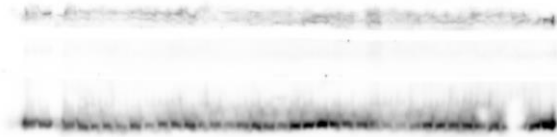

p/t CREB (figure 3 b)

t CREB

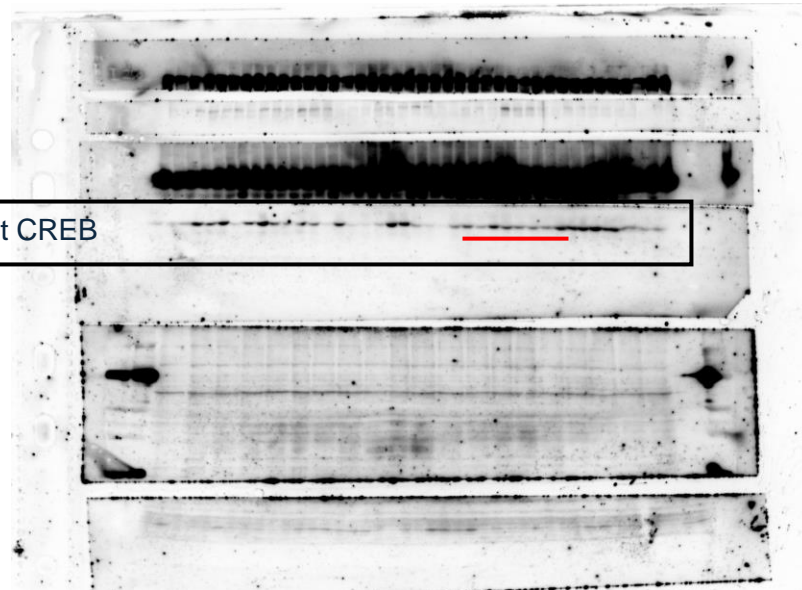



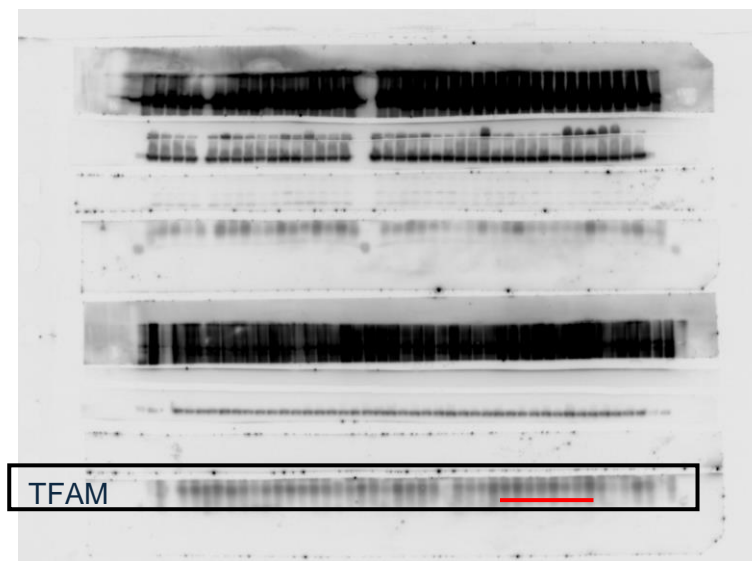

TFAM

TFAM (figure 3 e)

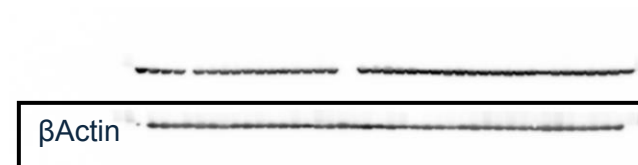

$\beta$ Actin

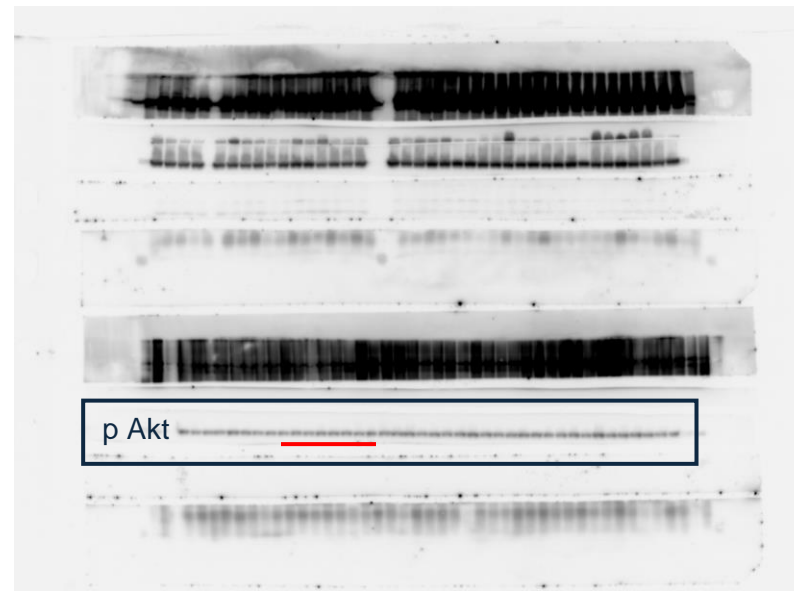

p/t AKT (figure 3 d)

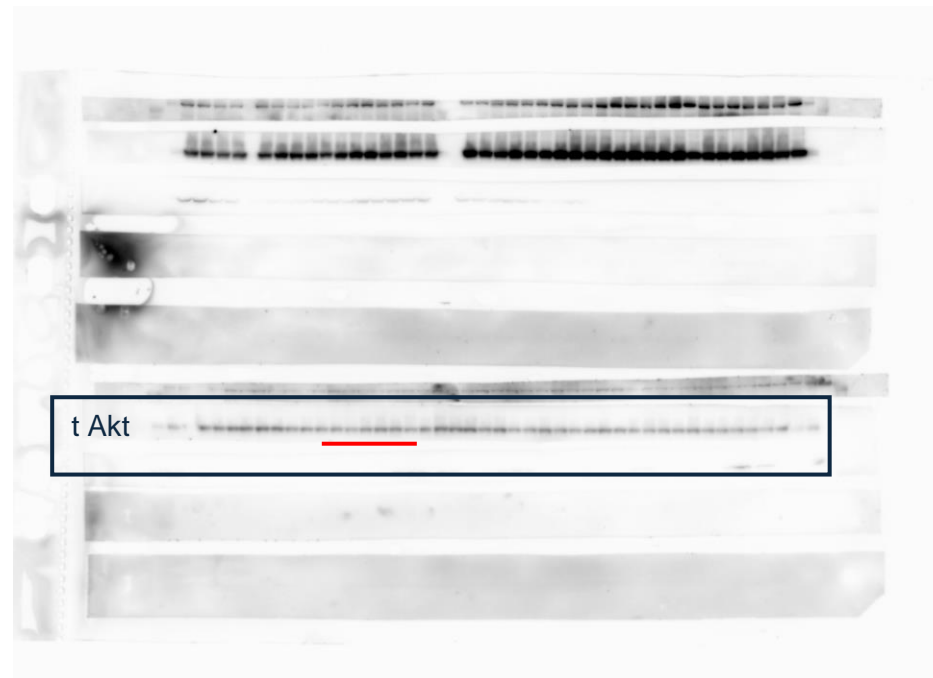

CBS

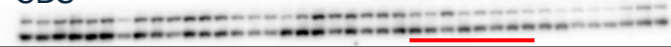

CBS (figure 3 f)

$\alpha$ Tubulin

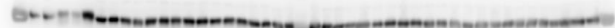

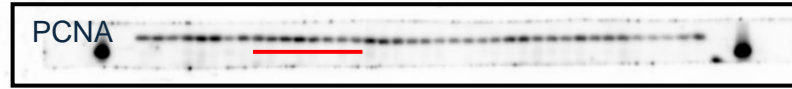

PCNA (figure 3 g)

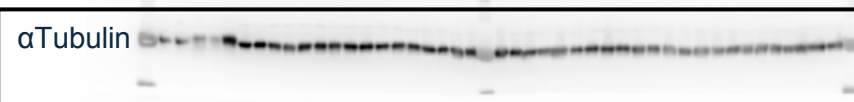

PGC-1 $\alpha$

$\alpha$ Tubulin

PGC-1 $\alpha$  in skeletal  
muscle
